# Supplementary material for: Cs and Sr removal over highly effective adsorbents ETS-1 and ETS-2
Source: Royal Society of Chemistry journal article supplement (doi:10.1039/c4ta06170e), 2014-11-19
Supplement: c4ta06170e1.pdf [file c4ta06170e1.pdf]

### Supplementary Data

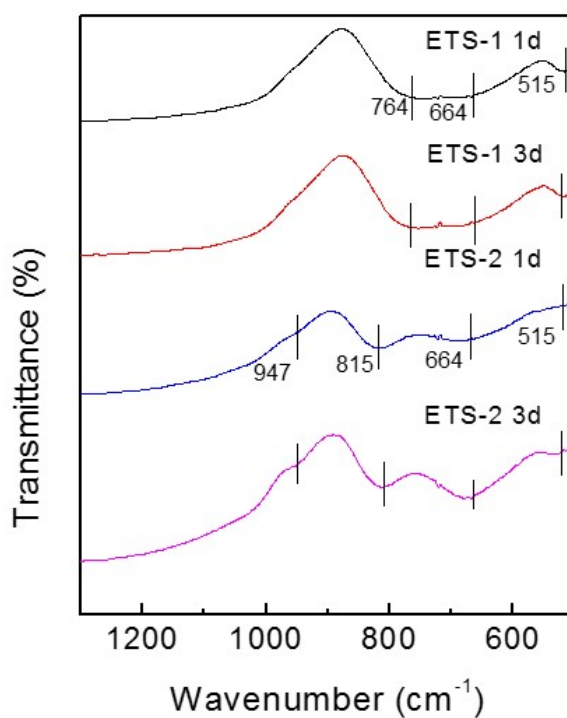

Fig. 1s IR spectra of ETS-1 and ETS-2

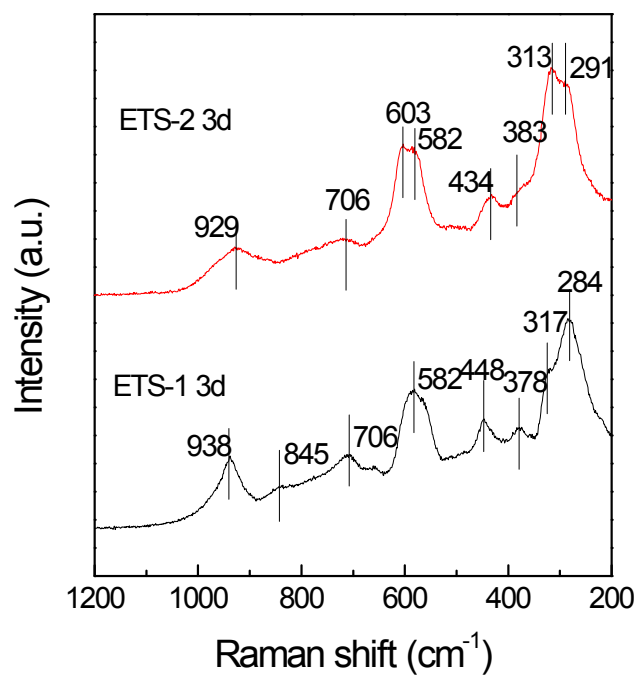

Fig. 2s Raman spectra of ETS-1 and ETS-2

The IR and Raman spectra of ETS-1 and ETS-2 revealed that they were exhibiting different peaks, indicating ETS-1 and ETS-2 were different materials. There might be some differences between the structures of ETS-1 and ETS-2, not simply the partial replacement of Na by K. (At this moment, it is difficult for us to ascribe the peaks well).

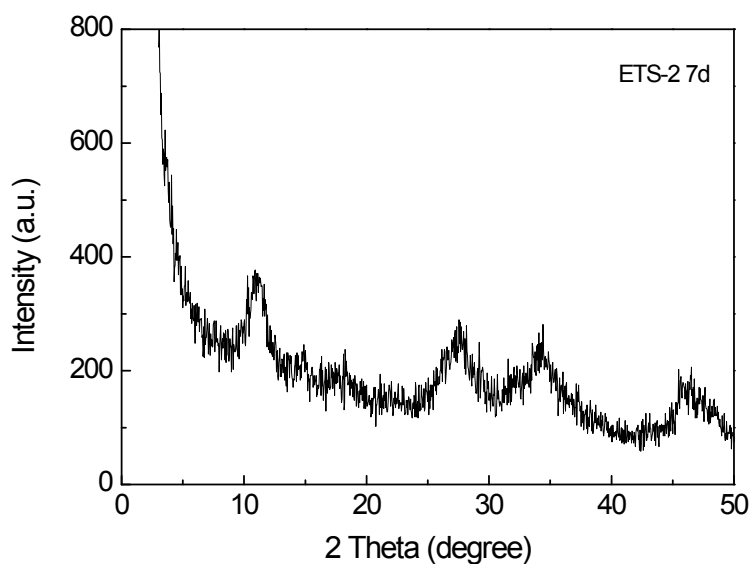

Fig.3s XRD patterns of ETS-2 7d

The XRD pattern of ETS-2-7d was quite weak, indicating that ETS-2 was a poorly crystallized material.
